# Supplementary material for: Plasma contains ultrashort single-stranded DNA in addition to nucleosomal cell-free DNA
Source: PubMed Central journal article supplement (PMC9254344; doi:10.1016/j.isci.2022.104554), 2022-06-08
Supplement: mmc1.pdf [file mmc1.pdf]

iScience, Volume 25

## **Supplemental information**

### **Plasma contains ultrashort single-stranded DNA in addition to nucleosomal cell-free DNA**

**Jordan Cheng, Marco Morselli, Wei-Lun Huang, You Jeong Heo, Thalyta Pinheiro-Ferreira, Feng Li, Fang Wei, David Chia, Yong Kim, Hua-Jun He, Kenneth D. Cole, Wu-Chou Su, Matteo Pellegrini, and David T.W. Wong**

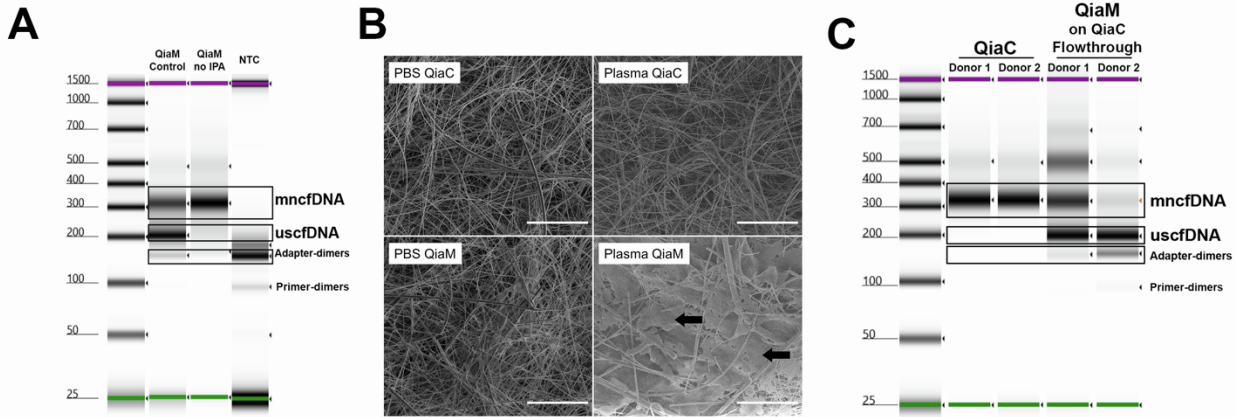

**Figure S1. Inherent characteristics of the QiaM extraction protocol (related to Figure 2).** (A) The increased isopropanol (1.8ml to 2.3ml) is integral to retaining the uscfDNA from plasma. (B) SEM images of the Qiagen silica filter show global sheet-like deposits (black arrows) only in QiaM extraction of plasma. Scale bars (white line) represents 50uM. (C) Using the Qiagen Kit with a centrifuge (as opposed to vacuum), the flow through from a QiaC plasma extraction was subsequently extracted with QiaM to reveal the rescue of the uscfDNA band.

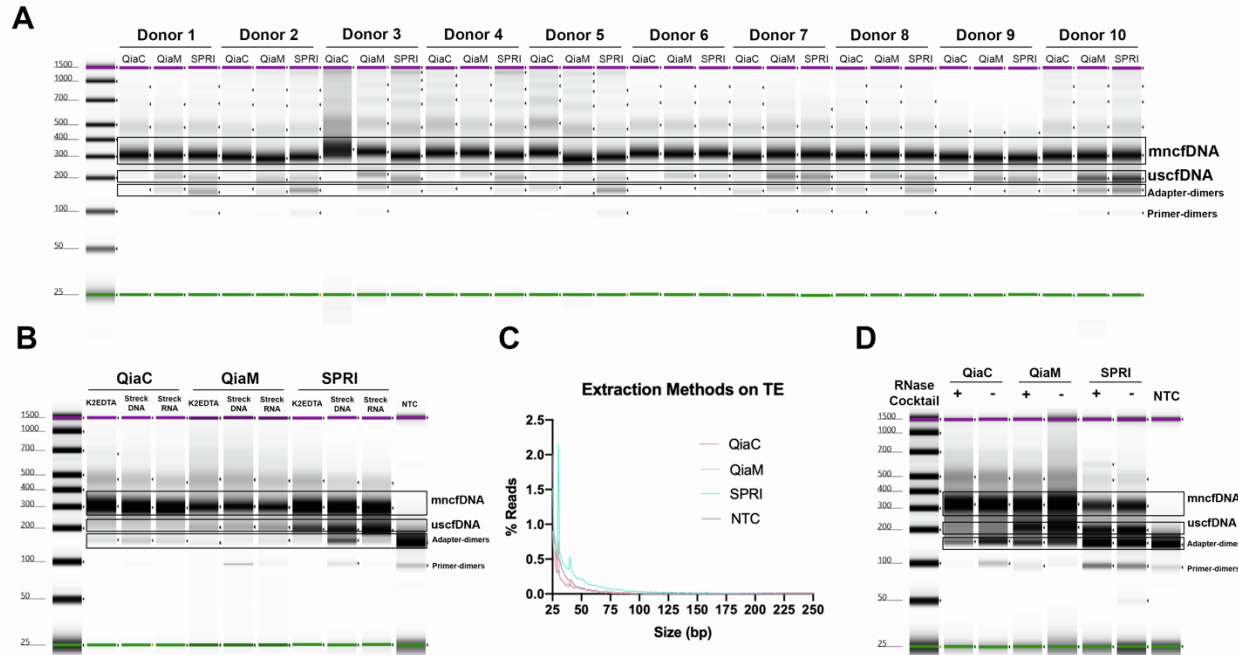

**Figure S2. UscfDNA can be consistently observed (related to Figure 2B). (A)** Electropherogram images of ten healthy donors extracted with QiaC, QiaM, and SPRI showing the presence of uscfDNA. **(B)** UscfDNA exists independently of the whole blood collection tube. **(C)** TE buffer control extracted with the three methods do not produce uscfDNA or mncfDNA peaks when aligned to the human genome. **(D)** RNase cocktail digestion prior to library preparation does not reduce the uscfDNA band in QiaM and SPRI extracted samples.

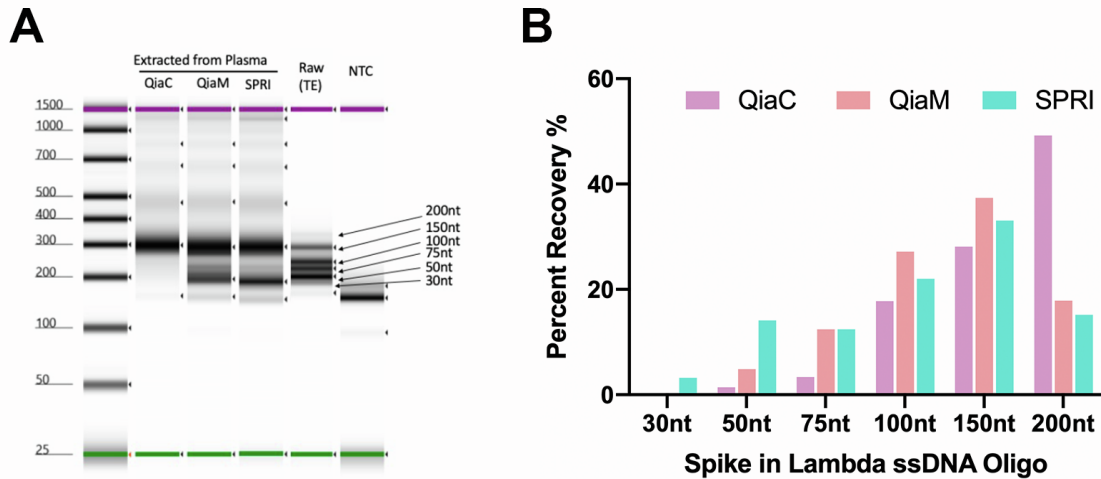

**Figure S3. Magnetic bead extraction methods may capture short and single-stranded DNA molecules better than silica column-based methods (related to Figure 2). (A)** Extraction of healthy plasma spiked with a ladder of short lambda ssDNA oligos shows various retention efficiencies between QiaC, QiaM and SPRI methods. **(B)** After alignment to the lambda genome shows QiaM and SPRI methods have greater efficiency of extracting ultrashort ssDNA molecules.

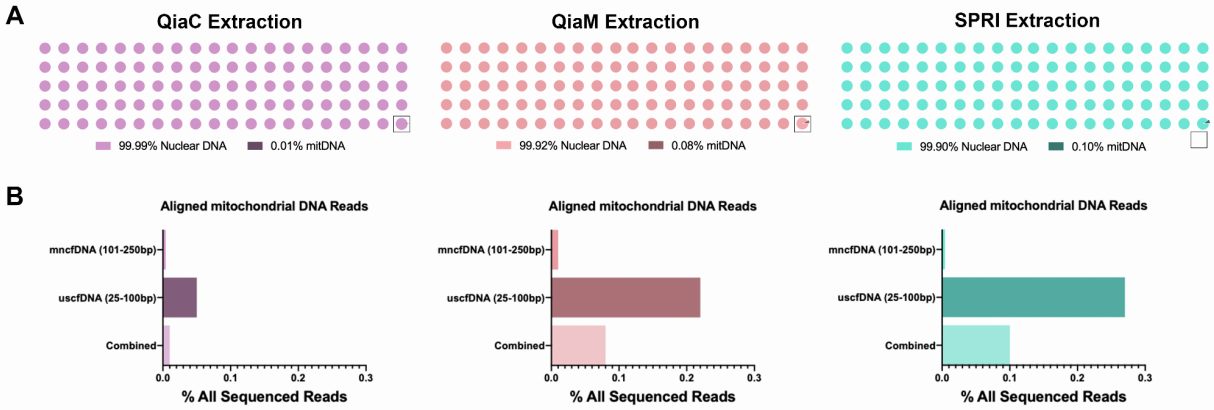

**Figure S4. Mitochondrial contribution to cfDNA (related to Figure 2).** (A) The majority of DNA aligns to the nuclear genome and not to the mitochondrial genome. Square indicates the visual representation of contribution of mitochondria reads. Extraction methods: QiaC (fuchsia), QiaM (pink), and SPRI (teal). (B) QiaM and SPRI are enriched for mitochondrial DNA in the uscfDNA population but still is a minor fraction of total DNA.

**A**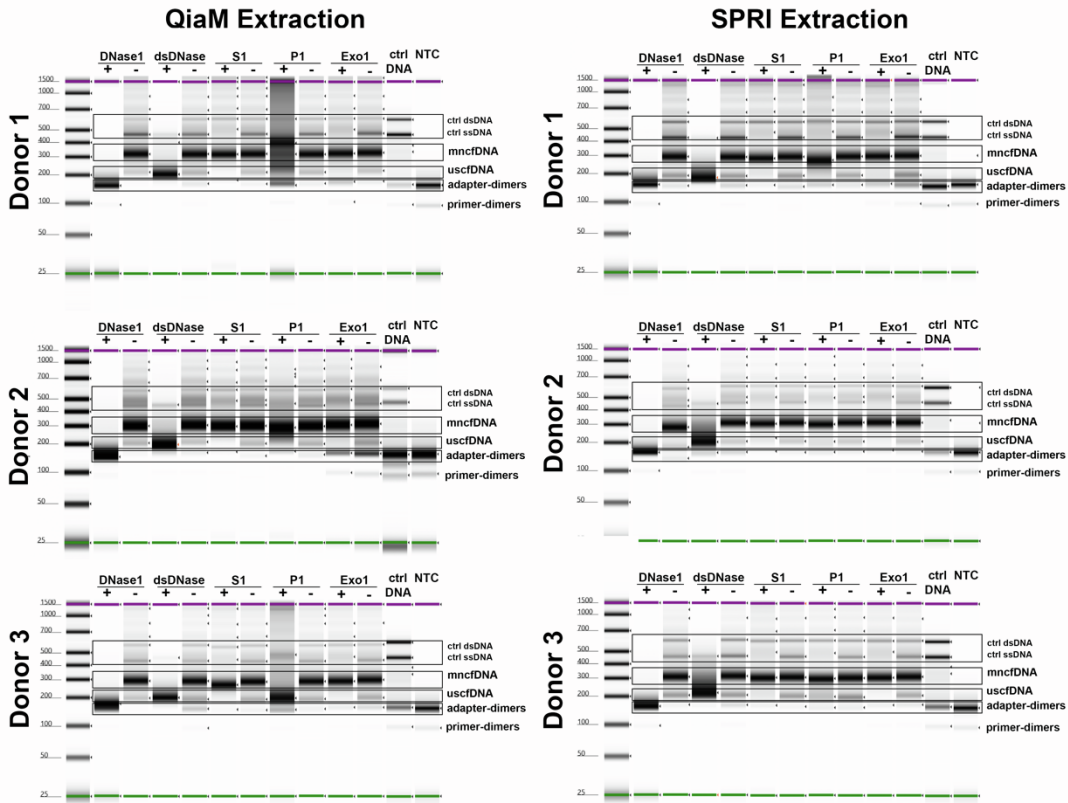**B**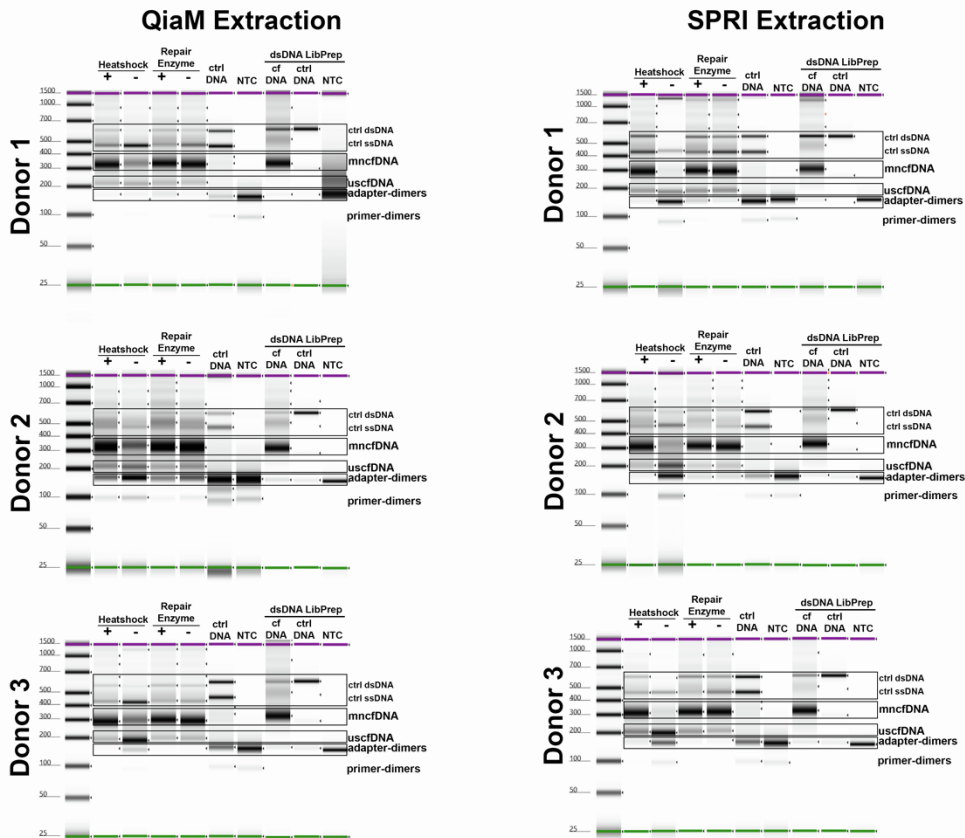

**Figure S5. Electropherograms of final libraries prepared from different treatments (related to Figure 3).** (A) Electropherograms of final libraries constructed from extracted cfDNA after nuclease digestion. (B) Electropherograms of final libraries constructed from extracted cfDNA after undergoing ssDNA, dsDNase library preparation and nick-repair enzyme treatment. Replicate experiments using plasma from three healthy donors extracted by QiaM and SPRI.

**A****QiaM Extraction**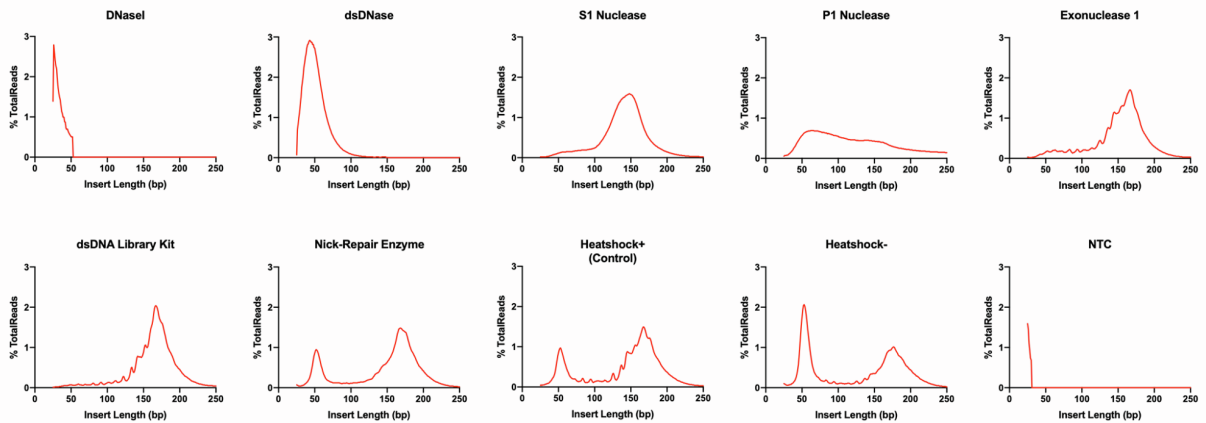**B****SPRI Extraction**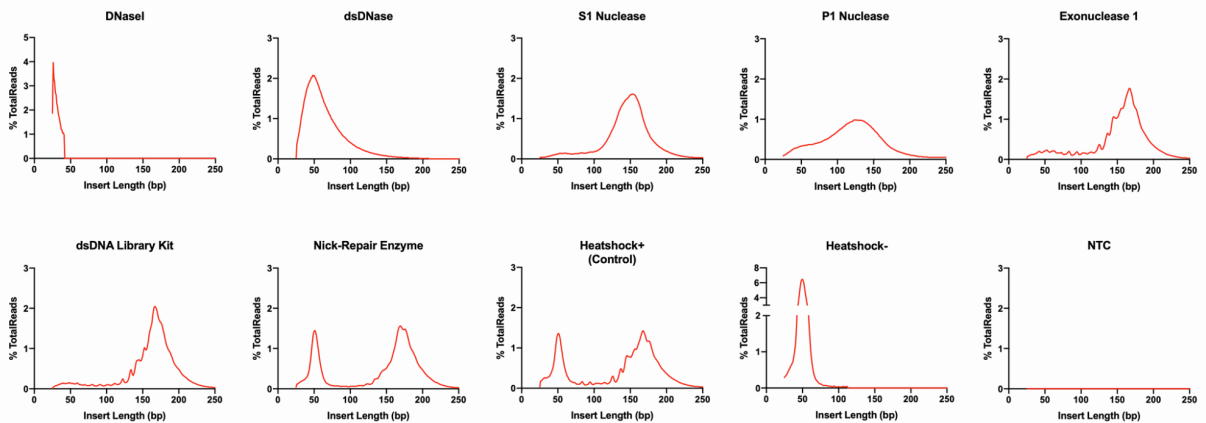

**Figure S6. Fragment length distribution of aligned reads from samples that underwent digestions or variations in the library prep method (related to Figure 3). Alignment of sequenced libraries to human genome pretreated by digestions and library preparation variations from Donor 1 of Sup Fig 3 extracted by QiaM (A) and SPRI (B). Reads with insert size under 25bp and above 250bp were excluded from the plots.**



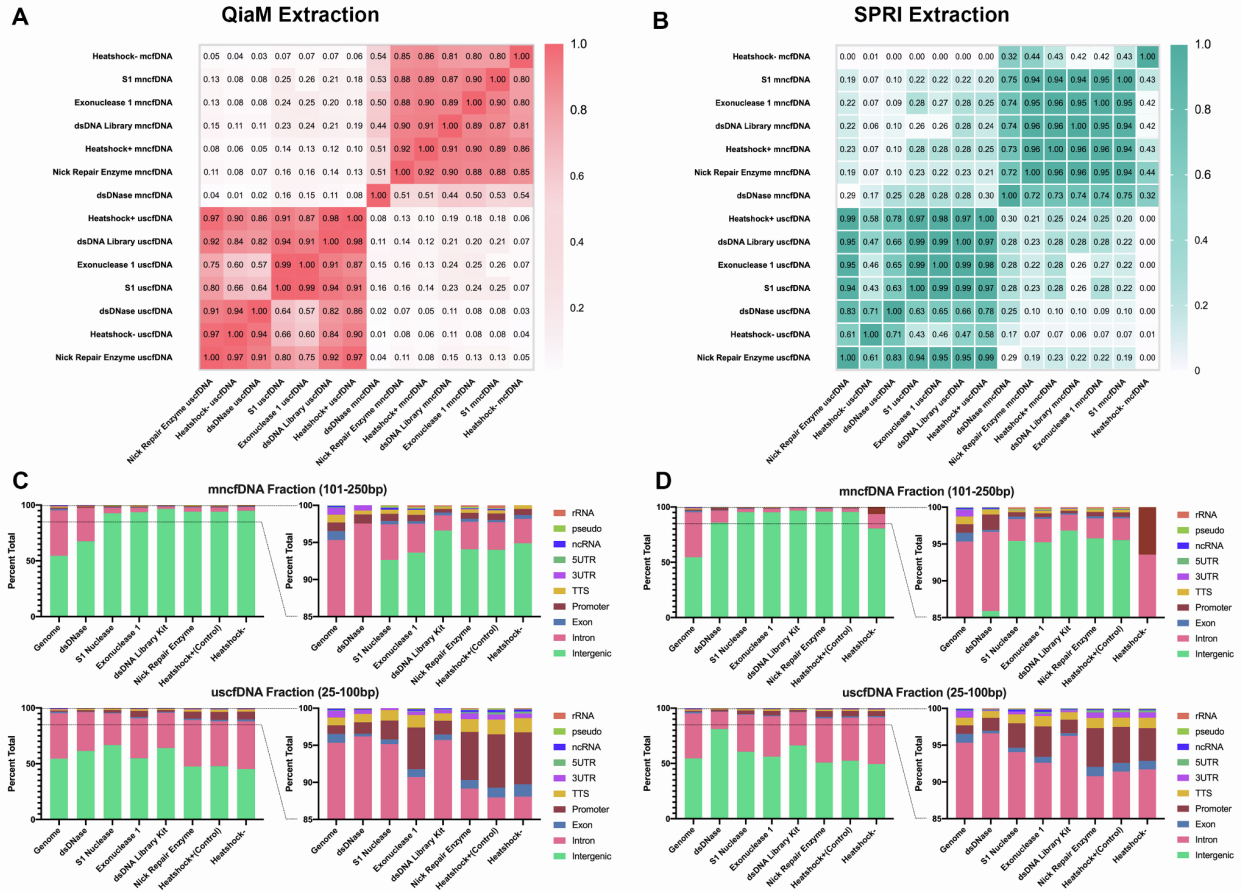

**Figure S7. Heatmap correlation uscfDNA and mncfDNA reads (related to Figure 3).** Heatmap correlation uscfDNA and mncfDNA reads of various digestions of samples extracted by QiaM (A) and SPRI (B). Individual functional element peak analysis of sequenced reads from digestions of QiaM (C) and SPRI (D) from Figure 3. Values are summated in Figure 4.

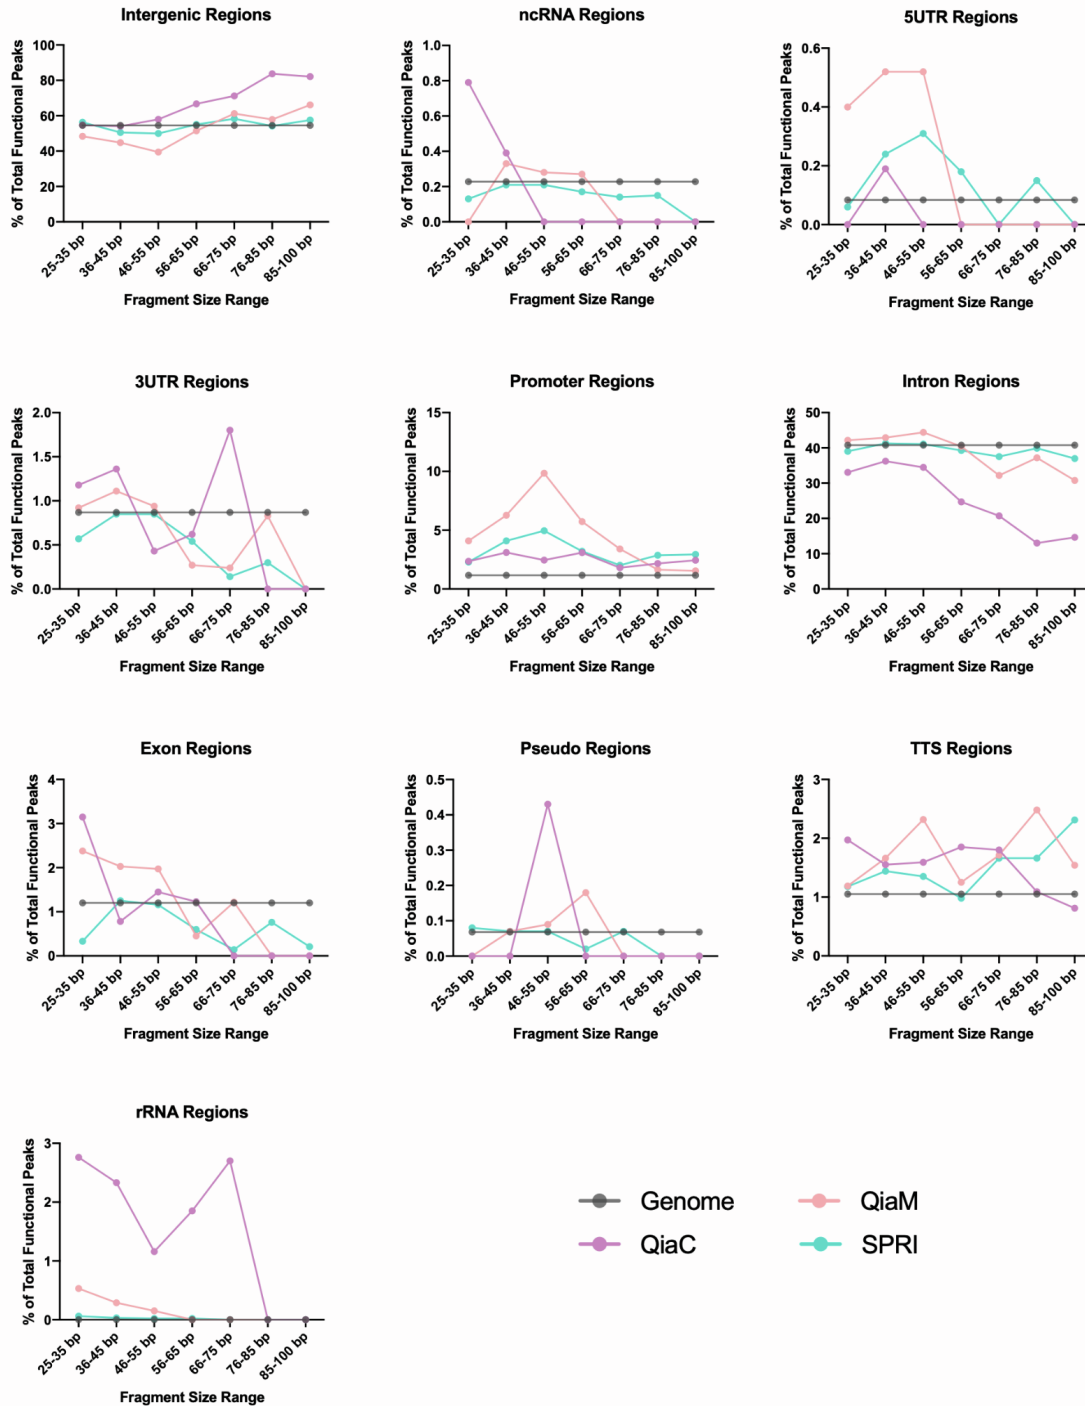

**Figure S8. The proportion of functional peaks at different fragment sizes (related to Figure 4).** Functional peaks were first called with macs2 (2.2.7.1 version) and then analyzed with HOMERannotatePeaks (version 4.11.1).

**Table S1. Plasma Donor Information (related to STAR Methods)**

| <b>Assay</b>                                 | <b>Gender</b> | <b>Age</b> |
|----------------------------------------------|---------------|------------|
| Digestions Donor 1                           | Male          | 47         |
| Digestions Donor 2                           | Female        | 57         |
| Digestions Donor 3                           | Male          | 35         |
| Healthy 10 Replicate Donor 1                 | Male          | 45         |
| Healthy 10 Replicate Donor 2                 | Male          | 18         |
| Healthy 10 Replicate Donor 3                 | Male          | 23         |
| Healthy 10 Replicate Donor 4                 | Male          | 26         |
| Healthy 10 Replicate Donor 5                 | Male          | 38         |
| Healthy 10 Replicate Donor 6                 | Male          | 33         |
| Healthy 10 Replicate Donor 7                 | Male          | 22         |
| Healthy 10 Replicate Donor 8                 | Male          | 37         |
| Healthy 10 Replicate Donor 9                 | Male          | 27         |
| Healthy 10 Replicate Donor 10                | Male          | 41         |
| Healthy Donor for QiaM on QiaC Flowthrough 1 | Male          | 19         |
| Healthy Donor for QiaM on QiaC Flowthrough 2 | Male          | 25         |

**Table S2. Synthetic Oligomers and Primers (related to STAR Methods)**

| Name                                                                                                                                                                                                                                                                                                                                                                                                                                                                                                      | Size   | ss/ds | Lambda phage region | Notes                              |
|-----------------------------------------------------------------------------------------------------------------------------------------------------------------------------------------------------------------------------------------------------------------------------------------------------------------------------------------------------------------------------------------------------------------------------------------------------------------------------------------------------------|--------|-------|---------------------|------------------------------------|
| Lambda dsDNA Control                                                                                                                                                                                                                                                                                                                                                                                                                                                                                      | 459 bp | ds    | 27'944:28'402       | PCR product, no UMI                |
| 5'-<br>CAAACTGCGCAACTCGTGAAAGGTAGGCGGATCCCCTTCGAAGGAAAGACCTGATGCTTTTCGTG<br>CGCGCATAAAATACCTTGATACTGTGCCGGATGAAAGCGGTTGCGGACGAGTAGATGCAATTATG<br>GTTTCTCCGCCAAGAATCTCTTTGCATTTATCAAGTGTTCCTTCATTGATATTCCGAGAGCATCAAT<br>ATGCAATGCTGTTGGGATGGCAATTTTTACGCCTGTTTTGCTTTGCTCGACATAAAGATATCCATCT<br>ACGATATCAGACCACTTCATTTGCATAAATCACCAACTCGTTGCCCGGTAACAACAGCCAGTTCC<br>ATTGCAAGTCTGAGCCAACATGGTATGATTCTGCTGCTTGATAAATTTTCAGGTATTCGTGAGCC<br>GTAAGTCTTGATCTCCTTACCTCTGATTTTGCTGCGCGAGTGGCAGCGACATGGTTTGTGT-3' |        |       |                     |                                    |
| Lambda ssDNA Control                                                                                                                                                                                                                                                                                                                                                                                                                                                                                      | 350 nt | ss    | 7'582:7'930         | IDT synthesized                    |
| 5'-<br>CCTGGCCAGAATGCAATAACGGGAGGCGCTGTGGCTGATTTTCGATAACCTGTTTCGATGCTGCCAT<br>TGCCCGCGCCGATGAAACGATACGCGGGTACATGGGAACGTCAGCCACCATTACATCCGGTGAG<br>CAGTCAGGTGCGGTGATACGTGGTGTTTTTGATGACCCTGAAAATATCAGCTATGCCGGACAGGG<br>CGTGCGGTTGAAGGCTCCAGCCCGTCCCTGTTTGTCCGACTGATGAGGTGCGGCAGCTGCGG<br>CGTGGAGACACGCTGACCATCGGTGAGGAAAATTTCTGGGTAGATCGGGTTTCGCCGGATGATGG<br>CGGAAGTTGTCATCTCTGGCTTGGAC-3'                                                                                                               |        |       |                     |                                    |
| lambda 200                                                                                                                                                                                                                                                                                                                                                                                                                                                                                                | 198 nt | ss    | 12'051:12'248       | IDT synthesized, internal-UMI 12nt |
| 5'-<br>AAGGCGGAGAGTCAGTTCGCGGNNNNNNNNNNNNCGGCGCAACGTCGCCAGCTGTCTGCACAG<br>GAGAAATCCCTGCTGGCGCATAAAGATGAGACGCTGGAGTACAAACGCCAGCTGGCTGCACTTGG<br>CGACAAGGTTACGTATCAGGAGCGCCTGAACGCGCTGGCGCAGCAGGCGGATAAATTCGCACAG<br>CAGCAA-3'                                                                                                                                                                                                                                                                              |        |       |                     |                                    |
| lambda 150                                                                                                                                                                                                                                                                                                                                                                                                                                                                                                | 150 nt | ss    | 35'073:35'201+UMI   | IDT synthesized, 3'-UMI 12nt       |
| 5'-<br>GCGTCCACTGCATGTTATGCCGCGTTCGCCAGGCTTGCTGTACCATGTGCGCTGATTCTTGCGCT<br>CAATACGTTGCAGGTTGCTTTCAATCTGTTTGTGGTATTCAGCCAGCACTGTAAGGTCTATCGGATT<br>TAGTGCNNNNNNNNNNNN-3'                                                                                                                                                                                                                                                                                                                                  |        |       |                     |                                    |
| lambda 100                                                                                                                                                                                                                                                                                                                                                                                                                                                                                                | 100 nt | ss    | 41'091:41'178+UMI   | IDT synthesized, 3'-UMI 12nt       |
| 5'-<br>TCGTTAGTTTCTCCGGTGGCAGGACGTCAGCATATTTGCTCTGGCTAATGGAGCAAAGCGACGG<br>GCAGGTAAAGACGTGCATTACGTNNNNNNNNNNNN-3'                                                                                                                                                                                                                                                                                                                                                                                         |        |       |                     |                                    |
| lambda 75                                                                                                                                                                                                                                                                                                                                                                                                                                                                                                 | 75 nt  | ss    | 18'204:18'266+UMI   | IDT synthesized, 3'-UMI 12nt       |

|                                                                                          |       |                                                                                              |                 |                              |
|------------------------------------------------------------------------------------------|-------|----------------------------------------------------------------------------------------------|-----------------|------------------------------|
| 5'-<br>TCGTATCGCATTATTGACCCGGCAAACGGGAATGAAACGCCGATGTTTGTGGCGCAGGGCAANN<br>NNNNNNNNNN-3' |       |                                                                                              |                 |                              |
| lambda 50                                                                                | 50 nt | ss                                                                                           | 2'321:2'359+UMI | IDT synthesized, 3'-UMI 12nt |
| 5'-ACCGCTTCCCGGTGCCGTTCACTTCCCGAATAACCCGGANNNNNNNNNNN-3'                                 |       |                                                                                              |                 |                              |
| lambda 30                                                                                | 30 nt | ss                                                                                           | 4'278:4'300+UMI | IDT synthesized, 3'-UMI 9nt  |
| 5'-ACGCGGTGACGACTATCAGGAAANNNNNNNN-3'                                                    |       |                                                                                              |                 |                              |
| 17 Extension<br>Primer Sequence<br>(i7 ext)                                              | 75 nt | 5'-<br>CAAGCAGAAGACGGCATAACGAGATNNNNNNNNNNXXXXXXXXXXGTGA<br>CTGGAGTTCAGACGTGTGCTCTCCGATCT-3' |                 |                              |
| Forward Index<br>Primer Sequence<br>(i5)                                                 | 70 nt | 5'-<br>AATGATACGGCGACCACCGAGATCTACACXXXXXXXXXACACTCTTTC<br>CCTACACGACGCTCTCCGATCT-3'         |                 |                              |
| Reverse Index<br>Primer Sequence<br>(Ui7)                                                | 21 nt | 5'- CAAGCAGAAGACGGCATAACGA-3'                                                                |                 |                              |

**Table S3. Numerical values related to Figure 2B.**

| uscfDNA region/total cfDNA (uscfDNA + mncfDNA) | Donor 1 | Donor 2 | Donor 3 | Donor 4 | Donor 5 | Donor 6 | Donor 7 | Donor 8 | Donor 9 | Donor 10 | Mean    |
|------------------------------------------------|---------|---------|---------|---------|---------|---------|---------|---------|---------|----------|---------|
| QiaC                                           | 7.04%   | 7.47%   | 5.00%   | 7.93%   | 7.81%   | 4.91%   | 11.80%  | 5.82%   | 8.39%   | 10.67%   | 7.68%   |
| QiaM                                           | 16.96%  | 17.77%  | 23.29%  | 11.44%  | 10.53%  | 13.15%  | 25.79%  | 11.63%  | 22.85%  | 32.18%   | 18.56 % |
| SPRI                                           | 17.63%  | 15.98%  | 21.59%  | 18.70%  | 11.44%  | 12.55%  | 24.51%  | 13.64%  | 22.68%  | 37.10%   | 19.58 % |

**Table S4. NGS Statistics related to Figure 2.**

|      | Total Reads Sequenced (Million) | Reads After Adapter Removal and Quality Filtering (Million) | Reads Mapped to Human Genome and Lambda (Million) | Reads Mapped to Human Genome Only (Million) | Human Genome Only Map Percentage <sup>A</sup> | Mean Human Genome Coverage | uscfdNA Reads Mapping (25-100bp) (Million) | % Proportion of uscfdNA Reads <sup>B</sup> | mncfdNA Reads Mapping (101-250bp) (Million) | % Proportion of mncfdNA Reads <sup>C</sup> | Remaining Reads (<25 & > 250bp) (Million) | % Proportion of Remaining Reads <sup>D</sup> |
|------|---------------------------------|-------------------------------------------------------------|---------------------------------------------------|---------------------------------------------|-----------------------------------------------|----------------------------|--------------------------------------------|--------------------------------------------|---------------------------------------------|--------------------------------------------|-------------------------------------------|----------------------------------------------|
| QiaC | <b>127.4</b>                    | <b>119.2</b>                                                | <b>116.4</b>                                      | <b>110.0</b>                                | 97.5%                                         | 5.05                       | <b>12.2</b>                                | 11.1%                                      | <b>88.0</b>                                 | 80.0%                                      | <b>9.7</b>                                | 8.86%                                        |
| QiaM | <b>111.7</b>                    | <b>101.8</b>                                                | <b>98.2</b>                                       | <b>67.8</b>                                 | 94.9%                                         | 3.23                       | <b>23.2</b>                                | 34.2%                                      | <b>42.8</b>                                 | 63.1%                                      | <b>1.8</b>                                | 2.63%                                        |
| SPRI | <b>135.4</b>                    | <b>118.0</b>                                                | <b>116.9</b>                                      | <b>86.5</b>                                 | 98.8%                                         | 3.75                       | <b>31.2</b>                                | 36.1%                                      | <b>53.2</b>                                 | 61.6%                                      | <b>2.0</b>                                | 2.33%                                        |

<sup>A</sup> Human Genome Only Map Percentage:  $\frac{\text{reads mapped to human genome}}{\text{all reads after QC and adapter removal} - \text{Lambda reads}}$

<sup>B</sup> % Proportion of uscfdNA Reads:  $\frac{\text{uscfdNA reads mapped to human genome}}{\text{all reads mapped to human genome}}$

<sup>C</sup> % Proportion of mncfdNA Reads:  $\frac{\text{mncfdNA reads mapped to human genome}}{\text{all reads mapped to human genome}}$

<sup>D</sup> % Proportion of Remaining Reads:  $\frac{\text{remaining reads mapped to human genome}}{\text{all reads mapped to human genome}}$

**Table S5. Numerical values related to Figure 2F.**

| Annotation | Genome | QiaC mncfDNA | QiaM mncfDNA | SPRI mncfDNA | QiaC uscfDNA | QiaM uscfDNA | SPRI uscfDNA |
|------------|--------|--------------|--------------|--------------|--------------|--------------|--------------|
| rRNA       | 0.00%  | 0.23%        | 0.43%        | 0.15%        | 0.51%        | 0.17%        | 0.01%        |
| pseudo     | 0.07%  | 0.06%        | 0.12%        | 0.11%        | 0.08%        | 0.10%        | 0.06%        |
| ncRNA      | 0.23%  | 0.02%        | 0.12%        | 0.00%        | 0.16%        | 0.28%        | 0.18%        |
| 5UTR       | 0.08%  | 0.00%        | 0.00%        | 0.00%        | 0.11%        | 0.32%        | 0.26%        |
| 3UTR       | 0.87%  | 0.00%        | 0.06%        | 0.00%        | 0.53%        | 0.62%        | 0.73%        |
| TTS        | 1.05%  | 0.21%        | 0.37%        | 0.33%        | 1.23%        | 1.96%        | 1.23%        |
| Promoter   | 1.16%  | 0.45%        | 0.73%        | 0.41%        | 3.42%        | 8.04%        | 4.44%        |
| Exon       | 1.20%  | 0.17%        | 0.24%        | 0.15%        | 1.12%        | 1.41%        | 1.12%        |
| Intron     | 40.76% | 2.44%        | 3.41%        | 2.43%        | 34.83%       | 42.55%       | 39.94%       |
| Intergenic | 54.57% | 96.41%       | 94.52%       | 96.42%       | 58.01%       | 44.55%       | 52.01%       |



**Table S6. NGS Statistics related to Figure 3A and B.**

| QiaM Extraction Method |                               |                                                           |                                                       |                               |               |
|------------------------|-------------------------------|-----------------------------------------------------------|-------------------------------------------------------|-------------------------------|---------------|
| Treatment              | Total Reads Sequenced (bases) | Reads After Adapter Removal and Quality Filtering (bases) | Total Reads Mapped to Human and Lambda Genome (bases) | Human and Lambda Genome Map % | Mean Coverage |
| DNaseI                 | 8393732                       | 1065752                                                   | 523570                                                | 49.1%                         | 0.005         |
| dsDNase                | 115213972                     | 111823988                                                 | 109985202                                             | 98.4%                         | 1.971         |
| S1 Nuclease            | 60057996                      | 56388884                                                  | 55103368                                              | 97.7%                         | 2.340         |
| P1 Nuclease            | 89318504                      | 70739876                                                  | 68063693                                              | 96.2%                         | 2.531         |
| Exonuclease 1          | 88988296                      | 74732014                                                  | 72354884                                              | 96.8%                         | 3.123         |
| dsDNA Library Kit      | 62108730                      | 58650304                                                  | 58270173                                              | 99.4%                         | 2.669         |
| Nick-Repair            | 54468958                      | 50417951                                                  | 47386326                                              | 94.0%                         | 1.862         |
| Heatshock+             | 110037748                     | 103970389                                                 | 99647927                                              | 95.8%                         | 4.007         |
| Heatshock-             | 41838040                      | 39416324                                                  | 36961704                                              | 93.8%                         | 1.360         |
| NTC                    | 2514676                       | 230826                                                    | 114609                                                | 49.7%                         | 0.001         |

| SPRI Extraction Method |                               |                                                           |                                                       |                               |               |
|------------------------|-------------------------------|-----------------------------------------------------------|-------------------------------------------------------|-------------------------------|---------------|
| Treatment              | Total Reads Sequenced (bases) | Reads After Adapter Removal and Quality Filtering (bases) | Total Reads Mapped to Human and Lambda Genome (bases) | Human and Lambda Genome Map % | Mean Coverage |
| DNaseI                 | 8466754                       | 1974781                                                   | 1162689                                               | 58.9%                         | 0.010         |
| dsDNase                | 185175564                     | 183938733                                                 | 183099719                                             | 99.5%                         | 3.882         |
| S1 Nuclease            | 104009908                     | 98239896                                                  | 97290270                                              | 99.0%                         | 4.155         |
| P1 Nuclease            | 165942090                     | 148324496                                                 | 146379814                                             | 98.7%                         | 5.597         |
| Exonuclease 1          | 186861886                     | 160648904                                                 | 158024760                                             | 98.4%                         | 6.891         |
| dsDNA Library Kit      | 101486352                     | 97757377                                                  | 97617788                                              | 99.9%                         | 4.463         |
| Nick-Repair            | 169084738                     | 152995334                                                 | 150434158                                             | 98.3%                         | 6.094         |
| Heatshock+             | 233954594                     | 218,543,557                                               | 218,543,557                                           | 99.2%                         | 8.853         |
| Heatshock-             | 11121808                      | 5508994                                                   | 5375857                                               | 97.6%                         | 0.153         |
| NTC                    | 6194542                       | 450739                                                    | 225630                                                | 50.1%                         | 0.002         |

**Table S7. Numerical values related to Figure 3A and B.**

| Donor |                                                          | QIAM      |       |       |         | SPRI      |       |       |         | QIAM      |               |               |               | SPRI      |               |               |               |
|-------|----------------------------------------------------------|-----------|-------|-------|---------|-----------|-------|-------|---------|-----------|---------------|---------------|---------------|-----------|---------------|---------------|---------------|
|       |                                                          | dsDNase + | S1+   | Exo1  | Control | dsDNase + | S1+   | Exo1  | Control | Heatshock | No Heat Shock | dsDNA Library | Repair Enzyme | Heatshock | No Heat Shock | dsDNA Library | Repair Enzyme |
| 1A    | uscfdNA (%integrated area of the intensity of 180-250bp) | 66.01     | 3.43  | 6.90  | 9.31    | 64.37     | 7.13  | 6.55  | 12.53   | 9.31      | 14.14         | 0.60          | 9.87          | 12.53     | 21.23         | 2.03          | 11.98         |
|       | mncfdNA (%integrated area of the intensity of 250-400bp) | 21.38     | 56.79 | 51.50 | 49.2    | 29.23     | 47.70 | 43.49 | 43.44   | 49.20     | 37.39         | 37.20         | 46.57         | 43.44     | 12.37         | 41.98         | 40.41         |
|       | uscfdNA fold signal from control or heatshock            | 7.09      | 0.37  | 0.74  | 1.00    | 5.14      | 0.57  | 0.52  | 1.00    | 1.00      | 1.52          | 0.06          | 1.06          | 1.00      | 1.69          | 0.16          | 0.96          |
|       | mncfdNA fold signal from control or heatshock            | 0.43      | 1.15  | 1.05  | 1.00    | 0.67      | 1.10  | 1.00  | 1.00    | 1.00      | 0.76          | 0.76          | 0.95          | 1.00      | 0.28          | 0.97          | 0.93          |
| 2A    | uscfdNA (%integrated area of the intensity of 180-250bp) | 69.13     | 3.53  | 5.87  | 11.93   | 48.15     | 7.16  | 4.99  | 11.12   | 11.93     | 17.96         | 1.85          | 8.01          | 9.12      | 26.28         | 2.88          | 8.01          |
|       | mncfdNA (%integrated area of the intensity of 250-400bp) | 18.02     | 68.28 | 56.93 | 52.58   | 36.94     | 64.80 | 61.32 | 57.75   | 52.58     | 32.03         | 51.89         | 54.18         | 61.02     | 23.21         | 51.84         | 54.18         |
|       | uscfdNA fold signal from control or heatshock            | 5.79      | 0.30  | 0.49  | 1.00    | 4.33      | 0.64  | 0.45  | 1.00    | 1.00      | 1.51          | 0.16          | 0.67          | 1.00      | 2.88          | 0.32          | 0.88          |
|       | mncfdNA fold signal from control or heatshock            | 0.34      | 1.30  | 1.08  | 1.00    | 0.64      | 1.12  | 1.06  | 1.00    | 1.00      | 0.61          | 0.99          | 1.03          | 1.00      | 0.38          | 0.85          | 0.89          |
| 3A    | uscfdNA (%integrated area of the intensity of 180-250bp) | 74.19     | 8.78  | 6.98  | 13.62   | 41.43     | 7.94  | 3.47  | 18.92   | 13.62     | 30.92         | 1.73          | 12.96         | 13.62     | 30.92         | 3.82          | 12.96         |
|       | mncfdNA (%integrated area of the intensity of 250-400bp) | 14.43     | 61.55 | 59.99 | 54.73   | 45.39     | 55.38 | 57.62 | 52.9    | 54.73     | 31.80         | 45.66         | 50.99         | 54.73     | 31.80         | 53.96         | 50.99         |
|       | uscfdNA fold signal from control or heatshock            | 5.45      | 0.64  | 0.51  | 1.00    | 2.19      | 0.42  | 0.18  | 1.00    | 1.00      | 2.27          | 0.13          | 0.95          | 1.00      | 2.27          | 0.28          | 0.95          |
|       | mncfdNA fold signal from control or heatshock            | 0.26      | 1.12  | 1.10  | 1.00    | 0.86      | 1.05  | 1.09  | 1.00    | 1.00      | 0.58          | 0.83          | 0.93          | 1.00      | 0.58          | 0.99          | 0.93          |
| Mean  | uscfdNA fold signal from control                         | 6.11      | 0.44  | 0.58  | 1       | 3.89      | 0.54  | 0.38  | 1       | 1.00      | 1.76          | 0.12          | 0.89          | 1.00      | 2.28          | 0.25          | 0.93          |
|       | mncfdNA fold signal from control                         | 0.35      | 1.19  | 1.08  | 1       | 0.72      | 1.09  | 1.05  | 1       | 1.00      | 1.76          | 0.12          | 0.89          | 1.00      | 2.28          | 0.25          | 0.93          |

**Table S8. Numerical values related to Figure 4A and B and Supplemental Figure 5C and D.**

|            | QiaM mncfDNA |                |                 |                     |                     |                       |                           |                            |                             |                   |             |
|------------|--------------|----------------|-----------------|---------------------|---------------------|-----------------------|---------------------------|----------------------------|-----------------------------|-------------------|-------------|
| Annotation | Genome       | DNaseI mncfDNA | dsDNase mncfDNA | S1 Nuclease mncfDNA | P1 Nuclease mncfDNA | Exonuclease 1 mncfDNA | dsDNA Library Kit mncfDNA | Nick Repair Enzyme mncfDNA | Heatshock+(Control) mncfDNA | Heatshock-mncfDNA | NTC mncfDNA |
| Intergenic | 54.573%      | 92.37%         | 67.54%          | 92.63%              | 87.72%              | 93.63%                | 96.60%                    | 94.08%                     | 94.01%                      | 94.88%            | 0%          |
| Intron     | 40.756%      | 4.79%          | 30.00%          | 4.81%               | 5.55%               | 3.88%                 | 2.05%                     | 3.70%                      | 3.71%                       | 3.30%             | 0%          |
| Exon       | 1.203%       | 0.44%          | 0.00%           | 0.44%               | 2.04%               | 0.33%                 | 0.37%                     | 0.40%                      | 0.29%                       | 0.50%             | 0%          |
| Promoter   | 1.165%       | 0.98%          | 1.23%           | 0.98%               | 3.06%               | 0.88%                 | 0.49%                     | 0.81%                      | 0.88%                       | 0.83%             | 0%          |
| TTS        | 1.050%       | 0.54%          | 0.53%           | 0.55%               | 0.53%               | 0.66%                 | 0.25%                     | 0.47%                      | 0.44%                       | 0.50%             | 0%          |
| 3UTR       | 0.869%       | 0.00%          | 0.70%           | 0.00%               | 0.15%               | 0.00%                 | 0.00%                     | 0.07%                      | 0.00%                       | 0.00%             | 0%          |
| 5UTR       | 0.084%       | 0.00%          | 0.00%           | 0.00%               | 0.49%               | 0.00%                 | 0.00%                     | 0.00%                      | 0.00%                       | 0.00%             | 0%          |
| ncRNA      | 0.228%       | 0.27%          | 0.00%           | 0.27%               | 0.23%               | 0.18%                 | 0.00%                     | 0.07%                      | 0.18%                       | 0.00%             | 0%          |
| pseudo     | 0.068%       | 0.27%          | 0.00%           | 0.27%               | 0.15%               | 0.18%                 | 0.08%                     | 0.20%                      | 0.11%                       | 0.00%             | 0%          |
| rRNA       | 0.001%       | 0.33%          | 0.00%           | 0.33%               | 0.08%               | 0.26%                 | 0.16%                     | 0.20%                      | 0.37%                       | 0.00%             | 0%          |

|            | QiaM uscfDNA |                |                 |                     |                     |                       |                           |                            |                             |                   |             |
|------------|--------------|----------------|-----------------|---------------------|---------------------|-----------------------|---------------------------|----------------------------|-----------------------------|-------------------|-------------|
| Annotation | Genome       | DNaseI uscfDNA | dsDNase uscfDNA | S1 Nuclease uscfDNA | P1 Nuclease uscfDNA | Exonuclease 1 uscfDNA | dsDNA Library Kit uscfDNA | Nick Repair Enzyme uscfDNA | Heatshock+(Control) uscfDNA | Heatshock-uscfDNA | NTC uscfDNA |
| Intergenic | 54.573%      | 56.80%         | 61.44%          | 66.75%              | 56.43%              | 54.92%                | 64.02%                    | 47.54%                     | 47.77%                      | 45.24%            | 60.33%      |
| Intron     | 40.756%      | 36.40%         | 34.76%          | 28.41%              | 27.03%              | 35.80%                | 31.69%                    | 41.61%                     | 40.20%                      | 42.84%            | 30.58%      |
| Exon       | 1.203%       | 0.84%          | 0.35%           | 0.62%               | 8.42%               | 1.06%                 | 0.74%                     | 1.16%                      | 1.32%                       | 1.65%             | 3.31%       |
| Promoter   | 1.165%       | 2.93%          | 1.54%           | 2.55%               | 4.45%               | 5.61%                 | 1.86%                     | 6.49%                      | 7.18%                       | 7.03%             | 3.31%       |
| TTS        | 1.050%       | 1.26%          | 1.13%           | 1.41%               | 1.35%               | 1.69%                 | 1.00%                     | 1.72%                      | 1.99%                       | 1.90%             | 0.00%       |
| 3UTR       | 0.869%       | 0.94%          | 0.51%           | 0.26%               | 0.74%               | 0.48%                 | 0.46%                     | 0.79%                      | 0.69%                       | 0.62%             | 0.83%       |
| 5UTR       | 0.084%       | 0.00%          | 0.03%           | 0.00%               | 0.25%               | 0.06%                 | 0.06%                     | 0.14%                      | 0.29%                       | 0.26%             | 0.00%       |
| ncRNA      | 0.228%       | 0.10%          | 0.14%           | 0.18%               | 0.52%               | 0.24%                 | 0.17%                     | 0.29%                      | 0.34%                       | 0.28%             | 0.00%       |
| pseudo     | 0.068%       | 0.00%          | 0.06%           | 0.18%               | 0.65%               | 0.09%                 | 0.00%                     | 0.14%                      | 0.16%                       | 0.08%             | 0.00%       |
| rRNA       | 0.001%       | 0.73%          | 0.04%           | 0.09%               | 0.15%               | 0.06%                 | 0.00%                     | 0.14%                      | 0.05%                       | 0.11%             | 1.65%       |

| SPRI mncfDNA |         |                |                 |                     |                     |                       |                           |                            |                             |                   |             |
|--------------|---------|----------------|-----------------|---------------------|---------------------|-----------------------|---------------------------|----------------------------|-----------------------------|-------------------|-------------|
| Annotation   | Genome  | DNaseI mncfDNA | dsDNase mncfDNA | S1 Nuclease mncfDNA | P1 Nuclease mncfDNA | Exonuclease 1 mncfDNA | dsDNA Library Kit mncfDNA | Nick Repair Enzyme mncfDNA | Heatshock+(Control) mncfDNA | Heatshock-mncfDNA | NTC mncfDNA |
| Intergenic   | 54.573% | 37.50%         | 85.90%          | 95.40%              | 94.86%              | 95.24%                | 96.82%                    | 95.77%                     | 95.53%                      | 80.65%            | 0%          |
| Intron       | 40.756% | 50.00%         | 10.75%          | 2.98%               | 3.24%               | 3.18%                 | 2.17%                     | 2.70%                      | 2.97%                       | 12.90%            | 0%          |
| Exon         | 1.203%  | 0.00%          | 0.27%           | 0.34%               | 0.27%               | 0.22%                 | 0.18%                     | 0.28%                      | 0.19%                       | 0.00%             | 0%          |
| Promoter     | 1.165%  | 0.00%          | 2.08%           | 0.61%               | 0.78%               | 0.52%                 | 0.36%                     | 0.61%                      | 0.61%                       | 6.45%             | 0%          |
| TTS          | 1.050%  | 0.00%          | 0.67%           | 0.24%               | 0.41%               | 0.37%                 | 0.26%                     | 0.28%                      | 0.32%                       | 0.00%             | 0%          |
| 3UTR         | 0.869%  | 0.00%          | 0.00%           | 0.00%               | 0.02%               | 0.00%                 | 0.03%                     | 0.00%                      | 0.03%                       | 0.00%             | 0%          |
| 5UTR         | 0.084%  | 0.00%          | 0.07%           | 0.02%               | 0.00%               | 0.02%                 | 0.00%                     | 0.00%                      | 0.00%                       | 0.00%             | 0%          |
| ncRNA        | 0.228%  | 0.00%          | 0.20%           | 0.02%               | 0.08%               | 0.05%                 | 0.03%                     | 0.03%                      | 0.05%                       | 0.00%             | 0%          |
| pseudo       | 0.068%  | 0.00%          | 0.07%           | 0.15%               | 0.14%               | 0.17%                 | 0.03%                     | 0.15%                      | 0.14%                       | 0.00%             | 0%          |
| rRNA         | 0.001%  | 12.50%         | 0.00%           | 0.22%               | 0.21%               | 0.25%                 | 0.13%                     | 0.18%                      | 0.17%                       | 0.00%             | 0%          |

| SPRI uscfDNA |         |                |                 |                     |                     |                       |                           |                            |                             |                   |             |
|--------------|---------|----------------|-----------------|---------------------|---------------------|-----------------------|---------------------------|----------------------------|-----------------------------|-------------------|-------------|
| Annotation   | Genome  | DNaseI uscfDNA | dsDNase uscfDNA | S1 Nuclease uscfDNA | P1 Nuclease uscfDNA | Exonuclease 1 uscfDNA | dsDNA Library Kit uscfDNA | Nick Repair Enzyme uscfDNA | Heatshock+(Control) uscfDNA | Heatshock-uscfDNA | NTC uscfDNA |
| Intergenic   | 54.573% | 60.38%         | 81.13%          | 60.62%              | 76.69%              | 56.15%                | 66.30%                    | 50.76%                     | 52.52%                      | 49.48%            | 54.17%      |
| Intron       | 40.756% | 35.52%         | 15.48%          | 33.44%              | 21.03%              | 36.46%                | 29.96%                    | 40.03%                     | 38.89%                      | 42.23%            | 39.24%      |
| Exon         | 1.203%  | 0.57%          | 0.35%           | 0.60%               | 0.31%               | 0.79%                 | 0.37%                     | 1.27%                      | 1.17%                       | 1.16%             | 2.08%       |
| Promoter     | 1.165%  | 1.73%          | 1.76%           | 3.31%               | 1.01%               | 4.15%                 | 1.83%                     | 5.26%                      | 4.90%                       | 4.44%             | 2.08%       |
| TTS          | 1.050%  | 0.87%          | 0.90%           | 1.21%               | 0.70%               | 1.40%                 | 1.02%                     | 1.38%                      | 1.26%                       | 1.42%             | 0.35%       |
| 3UTR         | 0.869%  | 0.42%          | 0.09%           | 0.39%               | 0.12%               | 0.35%                 | 0.25%                     | 0.75%                      | 0.74%                       | 0.73%             | 1.04%       |

|        |        |       |       |       |       |       |       |       |       |       |       |
|--------|--------|-------|-------|-------|-------|-------|-------|-------|-------|-------|-------|
| 5UTR   | 0.084% | 0.09% | 0.03% | 0.00% | 0.04% | 0.19% | 0.09% | 0.30% | 0.26% | 0.27% | 0.00% |
| ncRNA  | 0.228% | 0.09% | 0.09% | 0.28% | 0.04% | 0.35% | 0.12% | 0.16% | 0.16% | 0.17% | 0.00% |
| pseudo | 0.068% | 0.11% | 0.07% | 0.11% | 0.04% | 0.09% | 0.07% | 0.06% | 0.09% | 0.07% | 0.00% |
| rRNA   | 0.001% | 0.23% | 0.10% | 0.04% | 0.04% | 0.09% | 0.00% | 0.02% | 0.01% | 0.02% | 1.04% |
